## RESEARCH ARTICLE

# *In toto* imaging of early enteric nervous system development reveals that gut colonization is tied to proliferation downstream of Ret

Phillip A. Baker<sup>1,2</sup>, Rodrigo Ibarra-García-Padilla<sup>1,2</sup>, Akshaya Venkatesh<sup>1</sup>, Eileen W. Singleton<sup>1</sup> and Rosa. A. Uribe<sup>1,2,\*</sup>

## ABSTRACT

The enteric nervous system is a vast intrinsic network of neurons and glia within the gastrointestinal tract and is largely derived from enteric neural crest cells (ENCCs) that emigrate into the gut during vertebrate embryonic development. Study of ENCC migration dynamics and their genetic regulators provides great insights into fundamentals of collective cell migration and nervous system formation, and these are pertinent subjects for study due to their relevance to the human congenital disease Hirschsprung disease (HSCR). For the first time, we performed *in toto* gut imaging and single-cell generation tracing of ENCC migration in wild type and a novel *ret* heterozygous background zebrafish (*ret*<sup>wmr1/+</sup>) to gain insight into ENCC dynamics *in vivo*. We observed that *ret*<sup>wmr1/+</sup> zebrafish produced fewer ENCCs localized along the gut, and these ENCCs failed to reach the hindgut, resulting in HSCR-like phenotypes. Specifically, we observed a proliferation-dependent migration mechanism, where cell divisions were associated with inter-cell distances and migration speed. Lastly, we detected a premature neuronal differentiation gene expression signature in *ret*<sup>wmr1/+</sup> ENCCs. These results suggest that Ret signaling may regulate maintenance of a stem state in ENCCs.

**KEY WORDS:** Enteric neural crest, Zebrafish, Enteric nervous system, Differentiation, Proliferation, Ret

## INTRODUCTION

The vertebrate enteric nervous system (ENS) consists of a series of interconnected neurons and glia that form nerve plexuses spanning circumferentially within the muscle walls of the entire gastrointestinal (GI) tract. As the largest component of the peripheral nervous system, the ENS enables the GI tract to perform essential life functions such as peristalsis, gut hormone secretions and water balance during gut homeostasis (Furness, 2006). The ENS consists of various enteric neuron and glial cell types, which are classified based on molecular, electrophysiological and morphological means. In humans, along the entire length of the ENS, spanning from the esophagus to the anus, the ENS contains upwards of 600 million neurons, which together are capable of autonomous reflex activity (Furness, 2006), separate from the central nervous system (CNS).

In jawed vertebrates, the ENS is largely derived from neural crest cells (NCCs), a migratory and multipotent stem cell population that arises along the dorsal neural tube during neurulation within the vertebrate embryo. Specifically, the majority of the ENS is derived from NCCs that originate from a post-otic anatomical area along the neuraxis known as the vagal region (Harris and Erickson, 2007; Hutchins et al., 2018; Kuo and Erickson, 2011; Le Douarin and Teillet, 1973; Shepherd and Eisen, 2011). In zebrafish, vagal NCCs emigrate from the vagal region into anterior foregut mesenchyme tissue and migrate posteriorly down the gut length between 36 and 72 h postfertilization (hpf) (Ganz, 2018; Harrison et al., 2014; Nikaïdo et al., 2018; Shepherd and Eisen, 2011; Uribe and Bronner, 2015). In all jawed vertebrates, once resident in the gut the NCCs are known as enteric neural crest cells (ENCCs) and are characterized by combinatorial expression of the genes *Sox10*, *Phox2b*, *Ret* and *Gfrial* (Harrison et al., 2014; Hockley et al., 2019; Howard et al., 2021; Nagy and Goldstein, 2017; Shepherd et al., 2004; Southard-Smith et al., 1998; Taylor et al., 2016; Theveneau and Mayor, 2011). Following their gut colonization, zebrafish ENCCs differentiate into enteric neurons as early as 54 hpf, continuing between 72 and 120 hpf along the foregut, midgut and hindgut (Olden et al., 2008; Olsson et al., 2008). Although the general phases of ENS development and gut colonization have been mapped out, to date we lack comprehensive understanding of the cellular and intercellular mechanisms that orchestrate early ENS pattern manifestation.

Several crucial steps are known to be required for ENS development along the gut – including migration, proliferation and differentiation of ENCCs. Failure of ENCCs to colonize and differentiate into ENS leads to the congenital condition Hirschsprung disease (HSCR), in which variable regions of the gut lack neurons and glia in humans (Amiel et al., 2008; Heanue and Pachnis, 2007). Previous research focusing on the factors that may guide ENCC migration and their gut colonization have made recent progress. For example, different classes of receptor tyrosine kinases (RTKs), and their corresponding ligands, have been identified as crucial components. Among these, the ENCC co-receptor Ret and its mesenchymal-derived ligand, glial-derived neurotrophic factor (GDNF), are necessary for proper ENCC migration and survival along the gut (Landman et al., 2007; Natarajan et al., 2002; Shepherd et al., 2004; Taraviras et al., 1999; Young et al., 2001). Mutations in *RET* are the leading known cause of HSCR in humans (Amiel et al., 2008). Accordingly, due to its highly prevalent involvement in HSCR manifestation, *Ret* has been the primary gene of interest for many studies, mutations in which have previously been shown to induce HSCR-like hypoganglionosis and aganglionosis, in both zebrafish and mice models (Heanue et al., 2016; Uesaka et al., 2008). However, how Ret regulates ENCC

<sup>1</sup>BioSciences Department, Rice University, Houston, TX 77005, USA.

<sup>2</sup>Biochemistry and Cell Biology Program, Rice University, Houston, TX 77005, USA.

\*Author for correspondence (rosa.uribe@rice.edu)

 R.A.U., 0000-0002-0427-4493

Handling Editor: James Wells

Received 21 February 2022; Accepted 27 September 2022

mechanisms such as proliferation, differentiation and cell type specification *in vivo* remains poorly understood due to the highly dynamic development of ENS, GI inaccessibility of traditional amniote ENS models, as well as the ethical and technical limitations of investigating human prenatal development.

Despite advancements in our understanding of how early ENS develops, we still do not fully understand the tissue-wide strategies that ENCCs use to sculpt the ENS. Previous work in zebrafish (Harrison et al., 2014; Kuwata et al., 2019) has contributed to a growing body of work that implicate ENCC proliferation as key components of cell migration during colonization (Barlow et al., 2008; Peters-Van Der Sanden et al., 1993; Simpson et al., 2007; Young et al., 2004). However, we still do not fully understand the temporal dynamics of ENCC proliferation and migration during the entire process of colonization, and how those mechanisms are regulated by Ret. Here, using zebrafish larvae, the goal of this study was to resolve and quantify the cellular mechanisms of ENCC migration and proliferation in the context of Ret loss of function, in order to inform our understanding of how the ENS is constructed during early development.

## RESULTS

### Single-cell generation tracing of ENCCs during early ENS development *in toto*

To capture the entire process of gut colonization *in vivo*, time-lapse confocal microscopy was used to image larval zebrafish guts *in toto* and track  $-8.3phox2bb:Kaede^+$  cells, which faithfully labels

ENCCs (Harrison et al., 2014; Howard et al., 2022). All ENCCs were tracked, including new ENCCs generated from cell division. ENCC migration was followed from the foregut to hindgut for 48 h, between 48 and 96 hpf. (Fig. 1A-C; Movie 1). At 48 hpf,  $-8.3phox2bb:Kaede^+$  ENCCs emigrated into the foregut, and migrated posteriorly until reaching the hindgut boundary at 72 hpf (Fig. 1A,B; arrowheads). Between 72 and 96 hpf, ENCCs increased in number and began patterning into nascent ENS along the gut tube (Fig. 1B,C).

Imaris image analysis software allowed us to manually track the generations of every ENCC during the 48 h time period (Fig. 1D; Movie 2). Tracking including newly generated ENCCs produced by cell division, as shown in spatial cell tracks along the gut tube (Fig. 1D; Movies 3,4) and in an enteric generation tree over time (Fig. S1). Imaris tracking produced unique cellular generation labels that denoted ENCC hierarchical order within their respective generation tree, as schematized in Fig. 1E-G. As a cell divided along the anterior-posterior gut axis, the anterior-most daughter cell retained the unique ID and generation label of the original parent cell, whereas the posterior daughter cell was given a unique ID with a generation label corresponding to +1 to that of the parent cell that gave rise to the daughter (Fig. 1F,G). This imaging and generation analysis pipeline showed that zebrafish ENCC populations can be followed at single cell resolution over time and sets the stage to scrutinize gut-scale events during normal and abnormal early ENS development.

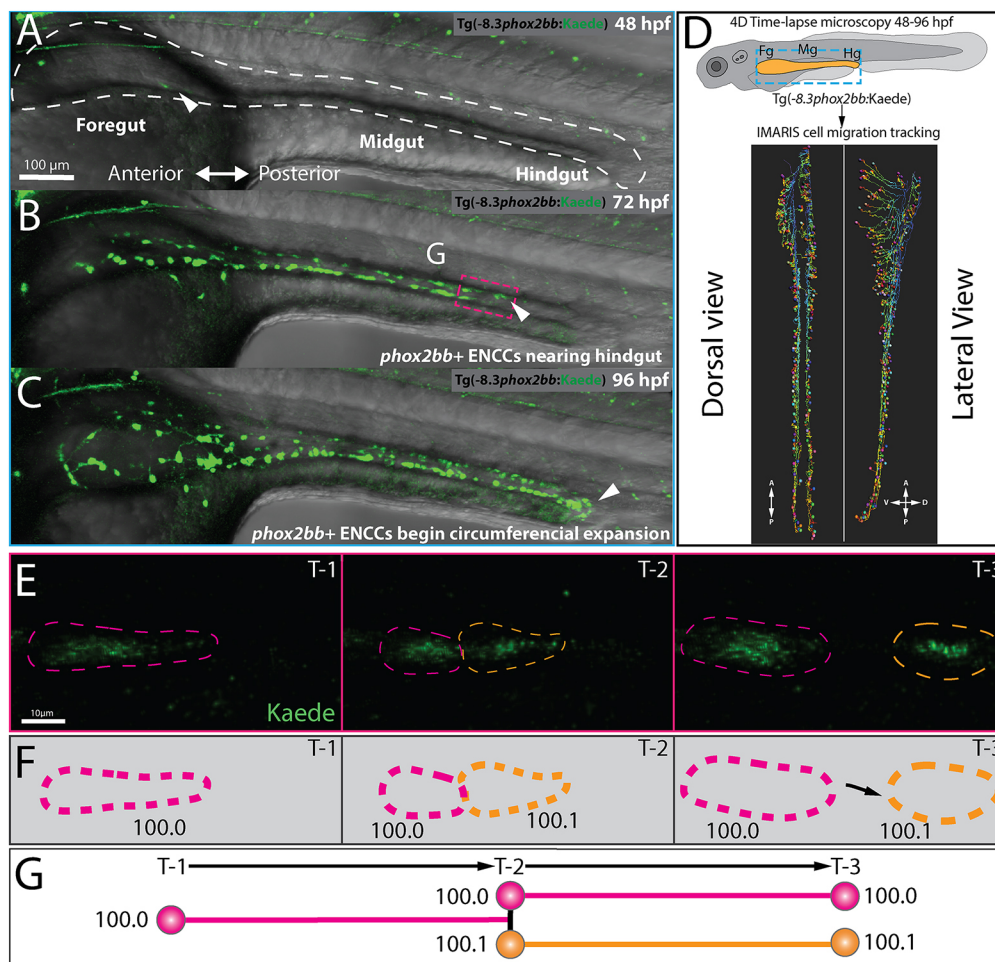

**Fig. 1. Single-cell generation tracing of ENCCs during early ENS development *in toto*.** (A-C) Still images from time-lapse reveal  $phox2bb^+$  ENCCs emerging into foregut intestine at 48 hpf (A, white arrow), leading ENCCs reaching the hindgut at 72 hpf (B, white arrow) and the circumferential expansion of ENCCs at 96 hpf (C). Dashed white line in A shows an outline of the gut tube region of interest. (D) Schematic (top) illustrates region of interests for time-lapse microscopy of ENCC migration in intestine and lateral and dorsal view snapshots (bottom) of single-cell migration tracking in Imaparis. (E) Expanded images of cell migration and division at the ENCC wavefront (boxed area, B). Time-points 1-3 (T1-3) depict representative time-points at which cell divisions occur. (F) Cartoon corresponds to cell outlines in panel E (dashed lines) and with representative unique ID labels that denote cell generation number as a decimal. (G) Cartoon generation-tree corresponds to cell divisions seen in panels E and F and depict how unique IDs are applied to cells throughout the time-lapse. A, anterior; D, dorsal; P, posterior; V, ventral.

### A novel CRISPR-Cas9-generated *ret* zebrafish mutant

In order to study the cellular mechanisms underlying ENS formation, and inform studies aimed at understanding cellular basis for neurocristopathy manifestation, the evolutionarily conserved gene *ret* was targeted for CRISPR-Cas9 mutagenesis. To accomplish this, a single guide RNA (sgRNA) targeting exon 8 of zebrafish *ret* (Fig. 2A) was generated and injected along with *cas9* mRNA into *-8.3phox2bb:Kaede* embryos (Fig. 2B). The mutation was isolated and identified by outcrossing injected

F0 *-8.3phox2bb:Kaede* fish to AB wild type (WT) to produce F1 families (Fig. 2B). F1 fish were fin clipped for genomic DNA (gDNA) isolation that was then sequenced; this identified an 11 base pair (bp) deletion resulting in a predicted premature stop codon within the coding sequence (CDS) (Fig. 2C), which is designated hereafter as *ret<sup>wmr1</sup>*. Following in-cross of *ret<sup>wmr1/+</sup>* F1s, F2 were seen to display either: WT (*ret<sup>+/+</sup>*) (Fig. 2D), hypoganglionosis (HSCR-like) (*ret<sup>wmr1/+</sup>*) (Fig. 2E) or total aganglionosis (*ret<sup>wmr1/wmr1</sup>*) (Fig. 2F) phenotypes. HSCR-like phenotypic fish

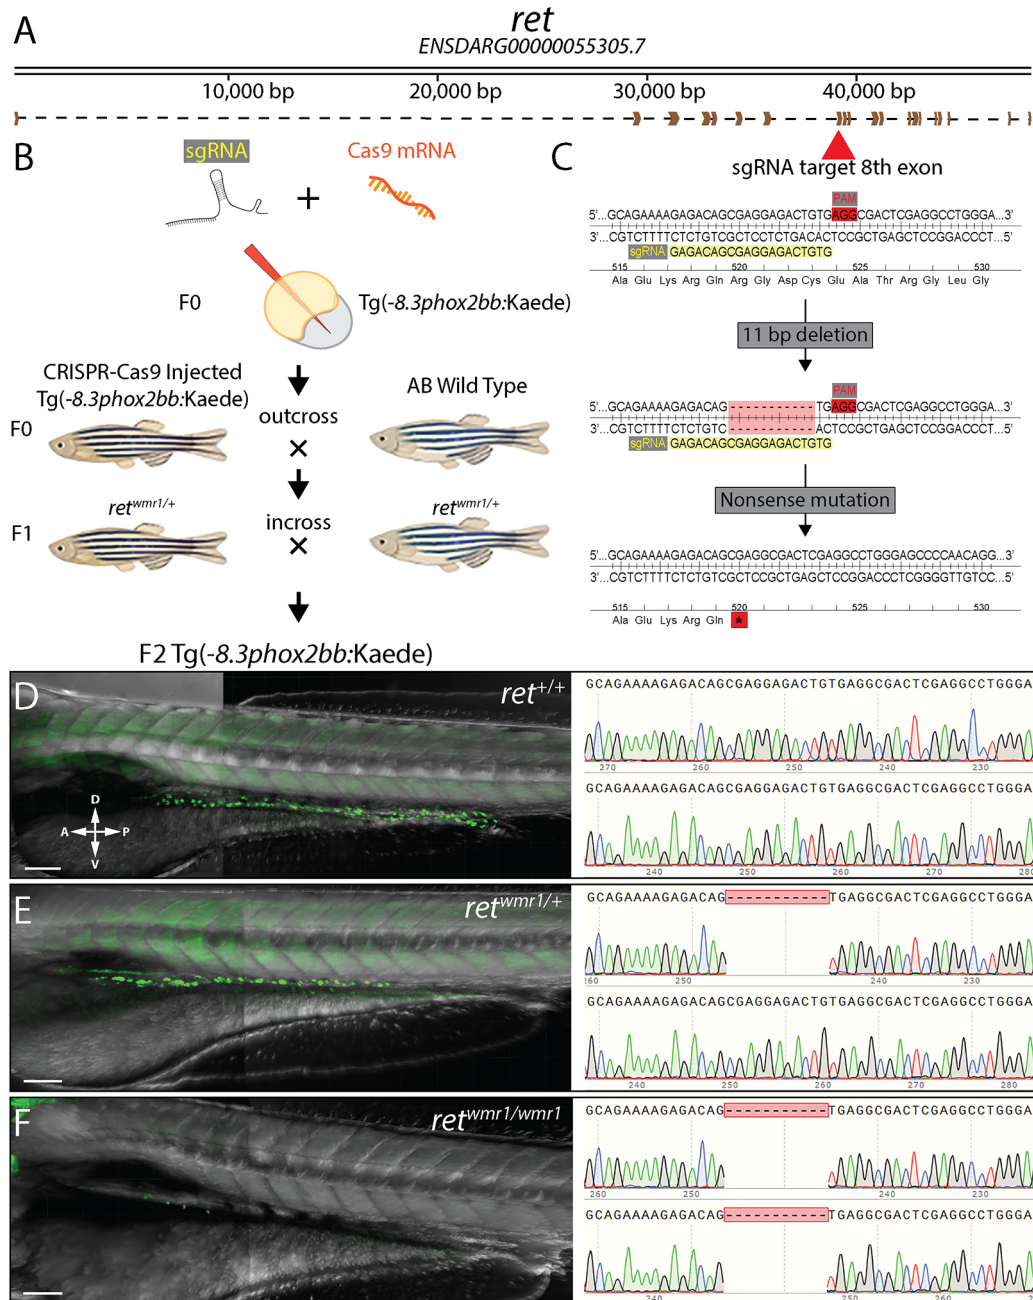

**Fig. 2. A novel CRISPR-Cas9 generated *ret* zebrafish mutant.** (A) Schematic of receptor tyrosine kinase gene, *ret* and its resulting mRNA. (B) Diagram depicting injection of sgRNA and Cas9 mRNA into *ret<sup>+/+</sup>* Tg(-8.3phox2bb:Kaede) and crosses used to isolate single CRISPR generate lesion within *ret* allele. (C) Zoomed in region of coding sequence of exon 8 (red arrow) targeted by sgRNA sequence (GAGACAGCGAGGAGACTGTG, yellow highlight) adjacent to PAM motif (red highlight). CRISPR-Cas9 activity at this locus generated an 11 bp deletion that resulted in nonsense mutation (stop codon, asterisk). (D-F) Representative images (left) and resulting genotypes (right) from in-crossing F1 heterozygotes harboring nonsense mutation (*ret<sup>wmr1/+</sup>*), which produces phenotypic WT (*ret<sup>+/+</sup>*) (D), hypoganglionosis or HSCR-like (*ret<sup>wmr1/+</sup>*) (E) and total aganglionosis (*ret<sup>wmr1/wmr1</sup>*) (F). Scale bars: 100  $\mu$ m. A, anterior; D, dorsal; P, posterior; V, ventral.



were found in less than 50% of F2 progeny because of incomplete penetrance and considerable variability in extent of aganglionosis (Table S1), an observation that is congruent with human HSCR manifestation, mammalian HSCR models and other *ret* heterozygous zebrafish models (Heanue and Pachnis, 2007; Heanue et al., 2016; Lake and Heuckeroth, 2013; Stanchina et al., 2006). To assess whether *ret<sup>wmr1</sup>* retained any of its function, a rescue experiment was performed by injecting mRNA coding for *ret<sup>wmr1</sup>* or *ret<sup>WT</sup>* into F2 in-crossed *-8.3phox2bb:Kaede;ret<sup>wmr1/+</sup>* embryos (Fig. S2). Injection of *ret<sup>wmr1</sup>* mRNA failed to rescue the number of larvae exhibiting total aganglionosis phenotypes by 96 hpf, whereas *ret<sup>WT</sup>* mRNA partially rescued diseased phenotypes, suggesting functional loss of *ret<sup>wmr1</sup>* mutant. The successful generation of the *ret<sup>wmr1/+</sup>* fish line provides a valuable zebrafish model for studying fundamental ENCC dynamics and ENS development.

### *ret<sup>wmr1/+</sup>* fish display a reduction in total ENCC number and migratory extent along the gut

To examine how the enteric defect phenotypes manifest in the *ret<sup>wmr1/+</sup>* model, we used the *in toto* time-lapse microscopy paradigm, as described in Fig. 1. Time-lapse datasets of *ret<sup>+/+</sup>* (Fig. 3A; Movie 1) and *ret<sup>wmr1/+</sup>* (Fig. 3B; Movie 5) fish were used to quantify total ENCC numbers over time, between 48 and 96 hpf (Fig. 3C). Although both conditions showed a steady temporal increase in ENCC number, *ret<sup>wmr1/+</sup>* fish displayed a significant reduction in overall ENCC number; whereas controls displayed an average of 172 ENCCs by 96 hpf, heterozygotes only had 101 (Fig. 3C). In each condition, ENCCs were observed migrating in two parallel chains (left and right) on lateral sides of the gut tube (Fig. 3D,E,H,I; Movies 2 and 6). The distance traveled by the

leading-most ENCCs (vanguard cells) on the left and right migratory chain was averaged across replicates and mapped in relation to the foregut region throughout the time course for both *ret<sup>+/+</sup>* and *ret<sup>wmr1/+</sup>* conditions (Fig. 3F). In both conditions, vanguard cells in the left and right migratory chains progressed posteriorly at similar rates until they reached their final distance at 96 hpf (Fig. 3F,G). *ret<sup>+/+</sup>* vanguard ENCCs displaced in a near linear fashion over time until they reached the distal boundary of the gut tube at ~78 hpf, ~1000  $\mu$ m from the foregut, at which point they could migrate no further (Fig. 3D,F-H). In contrast, although *ret<sup>wmr1/+</sup>* ENCCs migrated down the gut length, they failed to reach the hindgut and migrated only ~650  $\mu$ m from the foregut, a significantly shorter migration distance than *ret<sup>+/+</sup>* vanguard cells (Fig. 3E-G,I). Collectively, these data demonstrate a reduction in overall ENCC number and migratory extent between 48 and 96 hpf in *ret<sup>wmr1/+</sup>* fish. These results suggest that the collective cell migration and displacement of leading-edge ENCCs may be directly correlated to overall ENCC number.

### Generation of new ENCCs along the gut is compromised in *ret<sup>wmr1/+</sup>* fish

To investigate the hypothesis that ENCC number is correlated to cell displacement, we aimed to determine how the production of ENCC generations via cell proliferation was related to the overall displacement and spatiotemporal patterning of cells along the gut length. Using previously described generation labels (Fig. 1F,G), the total number of ENCC generations, as well as distances from the foregut of individual ENCC generations, were averaged and plotted versus hpf in *ret<sup>+/+</sup>* (Fig. 4A) and *ret<sup>wmr1/+</sup>* (Fig. 4C) conditions. In *ret<sup>+/+</sup>* fish, ENCCs produced 18 generations between 48 and 96 hpf, where each subsequent generation migrated further posterior

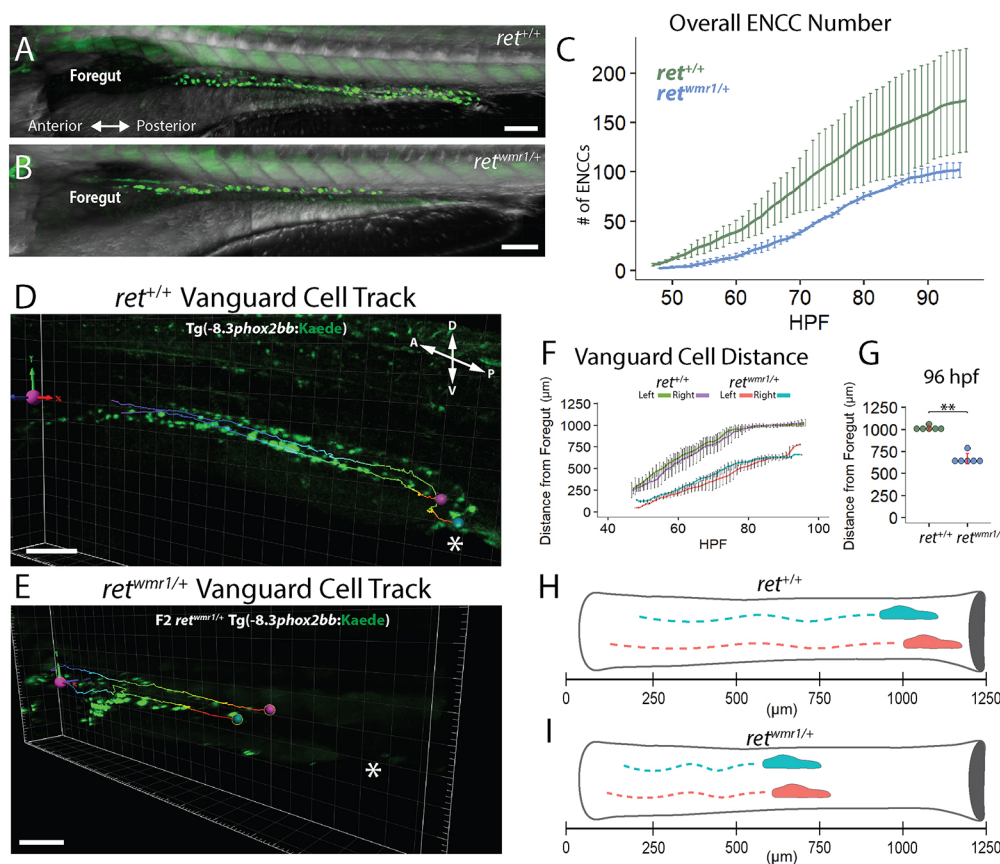

### Fig. 3. *ret<sup>wmr1/+</sup>* fish display a reduction in total ENCC number and migratory extent along the gut.

(A,B) Images of *ret<sup>+/+</sup>* (A) and *ret<sup>wmr1/+</sup>* Tg(-8.3phox2bb:Kaede) (B) fish show *phox2bb<sup>+</sup>* ENCCs within the intestine at 96 hpf. *ret<sup>wmr1/+</sup>* ENCCs fail to reach distal hindgut at 96 hpf. (C) Average number of ENCCs present during the 48-96 hpf time-lapse in *ret<sup>+/+</sup>* and *ret<sup>wmr1/+</sup>* fish ( $n=3$ ). (D,E) Snapshot of final 96 hpf time-point depicts migratory track of leading-edge cell (vanguard) in left (pink spot) and right (blue spot) ENCC chains (cloaca, white asterisk). (F) Average distance traveled by left and right vanguard cells in *ret<sup>+/+</sup>* and *ret<sup>wmr1/+</sup>* fish compared across 48-96 hpf ( $n=6$  per condition; data are mean $\pm$ s.e.m.). (G) Final position of vanguard cells at 96 hpf (Wilcoxon signed-rank test,  $**P=0.0022$ ). (H,I) Schematic depicts vanguard cells in left (pink) and right (blue) ENCC migratory chains in (H) *ret<sup>+/+</sup>* and (I) *ret<sup>wmr1/+</sup>*. Scale bars: 100  $\mu$ m. A, anterior; D, dorsal; P, posterior; V, ventral.



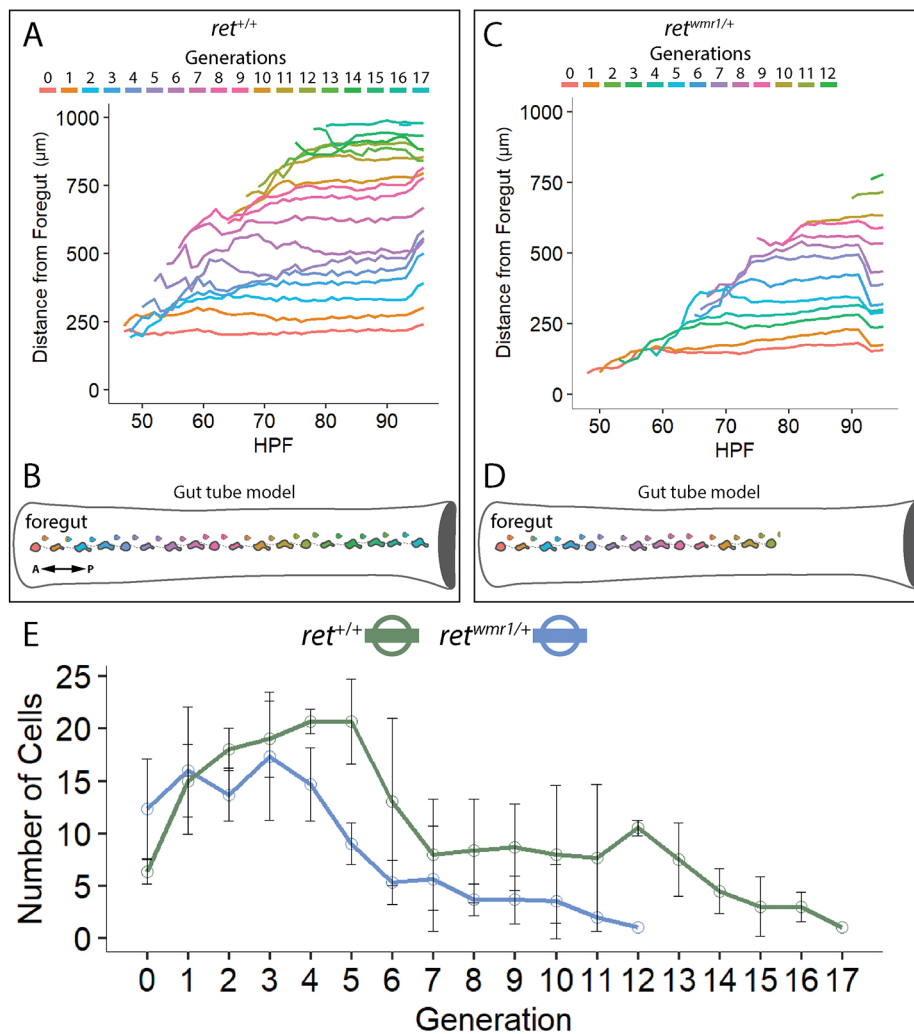

**Fig. 4. Generation of new ENCCs along the gut is compromised in  $ret^{wvr1/+}$  fish.** (A-D) ENCC proliferation produces successive generations of cells that migrate further than predecessors along the A-P axis of the gut tube. (A,B)  $ret^{+/+}$  ENCCs produce up to 18 generations to effectively colonize the entire gut tube ( $n=3$ ). (C,D)  $ret^{wvr1/+}$  ENCCs produce up to 13 generations that successively colonize the gut tube but fail to reach the hindgut ( $n=3$ ). (E) Average number of cells per given generation are reduced in  $ret^{wvr1/+}$  fish when compared with  $ret^{+/+}$ . Data are mean $\pm$ s.e.m. A, anterior; P, posterior.

than their predecessors in an ordered fashion until the gut tube was colonized (Fig. 4A,B). Although  $ret^{wvr1/+}$  ENCCs displayed similar posterior patterning, with subsequent generations migrating further than their predecessors, these ENCCs produced only 13 generations, and these failed to colonize the full gut length (Fig. 4C,D). Plotting the average number of cells per given generation revealed that  $ret^{wvr1/+}$  ENCC generations contained fewer cells, when compared with  $ret^{+/+}$  (Fig. 4E). These data support a model of proliferation-driven migration, where continual cell division produces daughter cells that migrate further than their predecessors, and suggests that reducing the number of cell divisions reduces their migratory extent.

#### **Analysis of $ret^{wvr1/+}$ highlights that distance between ENCCs is associated with deficient migration and proliferation during ENS formation**

Based on our observation that cell division was associated with cell displacement over time, we expected to see a reduction in cell migration speed as a function of cell number during this same window of ENCC migration. To quantify advancement rates of the leading-most ENCCs between 48 and 96 hpf, the migratory speed of vanguard ENCCs was averaged across conditional replicates (Fig. 5A,B). A sliding mean curve (every 5 h) was used to visualize average vanguard speed in  $ret^{+/+}$  (green) and  $ret^{wvr1/+}$  (blue) conditions (Fig. 5A). Although ENCCs in both conditions

displayed stable speeds between 48 and 70 hpf,  $ret^{wvr1/+}$  ENCCs showed lower speeds ( $\sim 21 \mu\text{m/h}$ ) when compared with  $ret^{+/+}$  ( $\sim 34 \mu\text{m/h}$ ) (Fig. 5A). Indeed, box plots comparing the average vanguard speed at intervals between 48 and 96 hpf revealed that  $ret^{wvr1/+}$  ENCCs migrated significantly slower than  $ret^{+/+}$  specifically during the 48-60 hpf interval (Fig. 5B).

In addition to slower speeds, in time-lapse movies we noted that ENCCs localized along the gut tube of  $ret^{wvr1/+}$  mutants looked qualitatively less densely spaced than  $ret^{+/+}$  control fish. To measure distances between ENCC along the gut during their migration, the average distance between three nearest ENCC neighbors was calculated and averaged across conditional replicates (Fig. 5C). While the  $ret^{wvr1/+}$  ENCCs eventually reached a similar average inter-cell distance as  $ret^{+/+}$  ENCCs by  $\sim 72$  hpf ( $\sim 24 \mu\text{m}$ ),  $ret^{wvr1/+}$  ENCCs were found to have greater inter-cell distances between  $\sim 48$ -72 hpf ( $\sim 49 \mu\text{m}$  versus  $\sim 38 \mu\text{m}$ ), congruent with the migratory window in which  $ret^{wvr1/+}$  ENCCs displayed slower migration speeds (Fig. 5B). Confirming this observation, box plots comparing the average distance between three nearest neighbors during windows at 48-60 hpf and 61-72 hpf showed that  $ret^{wvr1/+}$  ENCCs were spaced significantly further apart than their  $ret^{+/+}$  counterparts (Fig. 5D).

To further investigate the mechanism underlying lower vanguard displacement speed and overall ENCC inter-cell distances, we next sought to quantify ENCC proliferation *in situ*. Towards this end, a

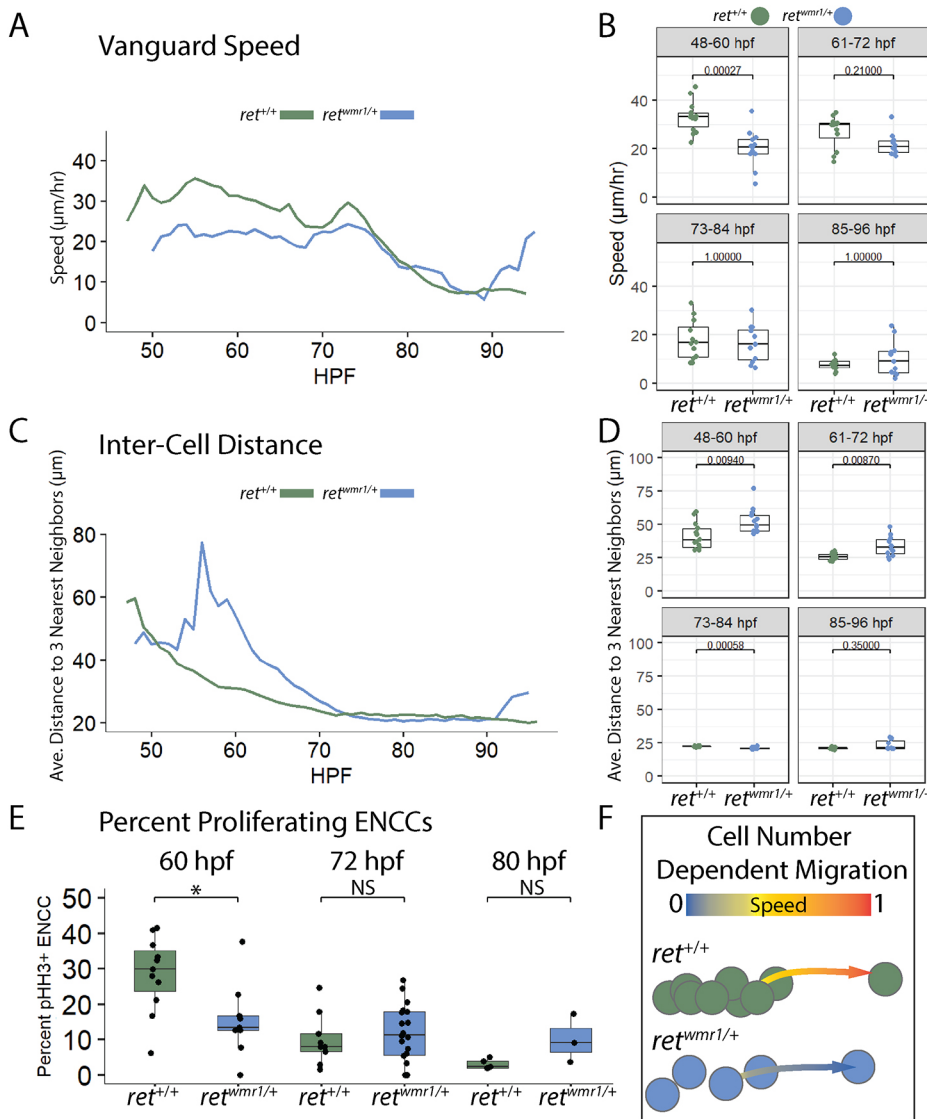

**Fig. 5. Proliferation-deficient *ret*<sup>wmmr1/+</sup> ENCCs highlight cell density-associated migration mechanism during ENS formation.** (A,B) Average speed of vanguard cell migration reveals a reduction in *ret*<sup>wmmr1/+</sup> ENCC speed during the key cell migration window of 48-60 hpf ( $n=6$  per condition; Wilcoxon signed-rank test,  $P=0.00027$ ). (C,D) Average distance to three nearest neighbors was calculated for each ENCC within an individual population and then averaged across conditional replicates and plotted versus hpf for both *ret*<sup>+/+</sup> and *ret*<sup>wmmr1/+</sup> fish ( $n=3$  per condition). Significantly higher distances between neighbors were observed among *ret*<sup>wmmr1/+</sup> ENCCs at 48-60 hpf (Wilcoxon signed-rank test,  $P=0.00940$ ) and 61-72 hpf (Wilcoxon signed-rank test,  $P=0.00870$ ), indicative of lower cell density. (E) Percent proliferating ENCCs was calculated using whole-mount immunofluorescence performed using Tg(-8.3*phox2bb*:Kaede) fish in combination with anti-pHH3 and anti-Kaede antibodies to calculate the percent pHH3<sup>+</sup>, Kaede<sup>+</sup> ENCCs at 60 hpf, 72 hpf and 80 hpf. *ret*<sup>wmmr1/+</sup> fish displayed a lower percentage of proliferating ENCCs at 60 hpf (Wilcoxon signed-rank test,  $*P=0.02$ ). NS, not significant. Box plots show median values (middle bars), and first to third interquartile ranges (boxes). Whiskers indicate 1.5 $\times$  the interquartile ranges; dots indicate mean values per hpf within the given time window. (F) Graphic depicts density-dependent migration model in which more densely spaced *ret*<sup>+/+</sup> ENCCs display higher speeds of migration than less densely spaced *ret*<sup>wmmr1/+</sup> ENCCs.

phospho-histone H3 (pHH3) antibody was used on fixed tissue at key time points of 60, 72 and 80 hpf to determine the percentage of ENCCs that were actively proliferating (Fig. 5E) (Gurley et al., 1978; Hendzel et al., 1997; Pérez-Cadahía et al., 2009). From these data, a lower percentage of ENCCs were pHH3<sup>+</sup> in *ret*<sup>wmmr1/+</sup> fish at 60 hpf compared with *ret*<sup>+/+</sup> ENCCs, but there was no significant difference at 72 and 80 hpf (Fig. 5E).

Collectively, these above-described data regarding cell speed, inter-cell distances and proliferation highlight an important developmental window between 48 and 72 hpf in which *ret*<sup>wmmr1/+</sup> ENCCs exhibit their most significant deficiencies. These results suggest a model of proliferation-coupled migration, and/or inter-cell distance-dependent migration, in which proliferation-deficient ENCCs fail to reach a cell number threshold needed to sustain posterior displacement of ENCCs along the length of the gut (Fig. 5F).

#### ***ret*<sup>wmmr1/+</sup> ENCCs display accelerated neuron differentiation gene expression and immunoreactive signatures**

Single-cell sequencing data from our previous work revealed that ENCCs displayed lineage-specific neuronal gene expression patterns at 69 hpf (Howard et al., 2021). Specifically, in addition to pan-neuronal markers, such as *elavl3*, ENCCs were beginning to

differentially express unique combinations of neurochemical gene markers such as *vipb nos1* and *slc18a3a*, as well as the intrinsic primary afferent neuron (IPAN)-specific transcription factor *pbx3b* (Howard et al., 2021). Notably, *vipb* was found to be expressed in nearly all early differentiating ENCCs, whereas the IPAN marker *pbx3b* was found in a very small subset of ENCCs, denoting a more specific enteric neuron subtype that arises later during ENS development. Due to the spatiotemporal-specific emergence of these enteric markers, we hypothesized that the timing and levels of their expression would be altered within *ret*<sup>wmmr1/+</sup> fish, indicative of aberrant differentiation timing.

In order to investigate the above hypothesis, hybridization chain reaction (HCR) was used to investigate gene expression patterns of *ret*<sup>wmmr1/+</sup> ENCCs, in comparison with *ret*<sup>+/+</sup>, at the developmental time-points between 60 and 120 hpf (Fig. 6A-J). Owing to its near ubiquitous expression, probes against *vipb* transcript were used to label differentiating enteric neurons, and *pbx3b* was used to mark enteric neuron specification into differentiating IPANs. From these analyses, *ret*<sup>wmmr1/+</sup> fish exhibited a higher percent of ENCCs displaying an IPAN gene signature compared with *ret*<sup>+/+</sup> cells, with the peak discrepancy appearing at 96 hpf (Fig. 6E-G). However, by 120 hpf *ret*<sup>wmmr1/+</sup> and *ret*<sup>+/+</sup> fish exhibited roughly an equal



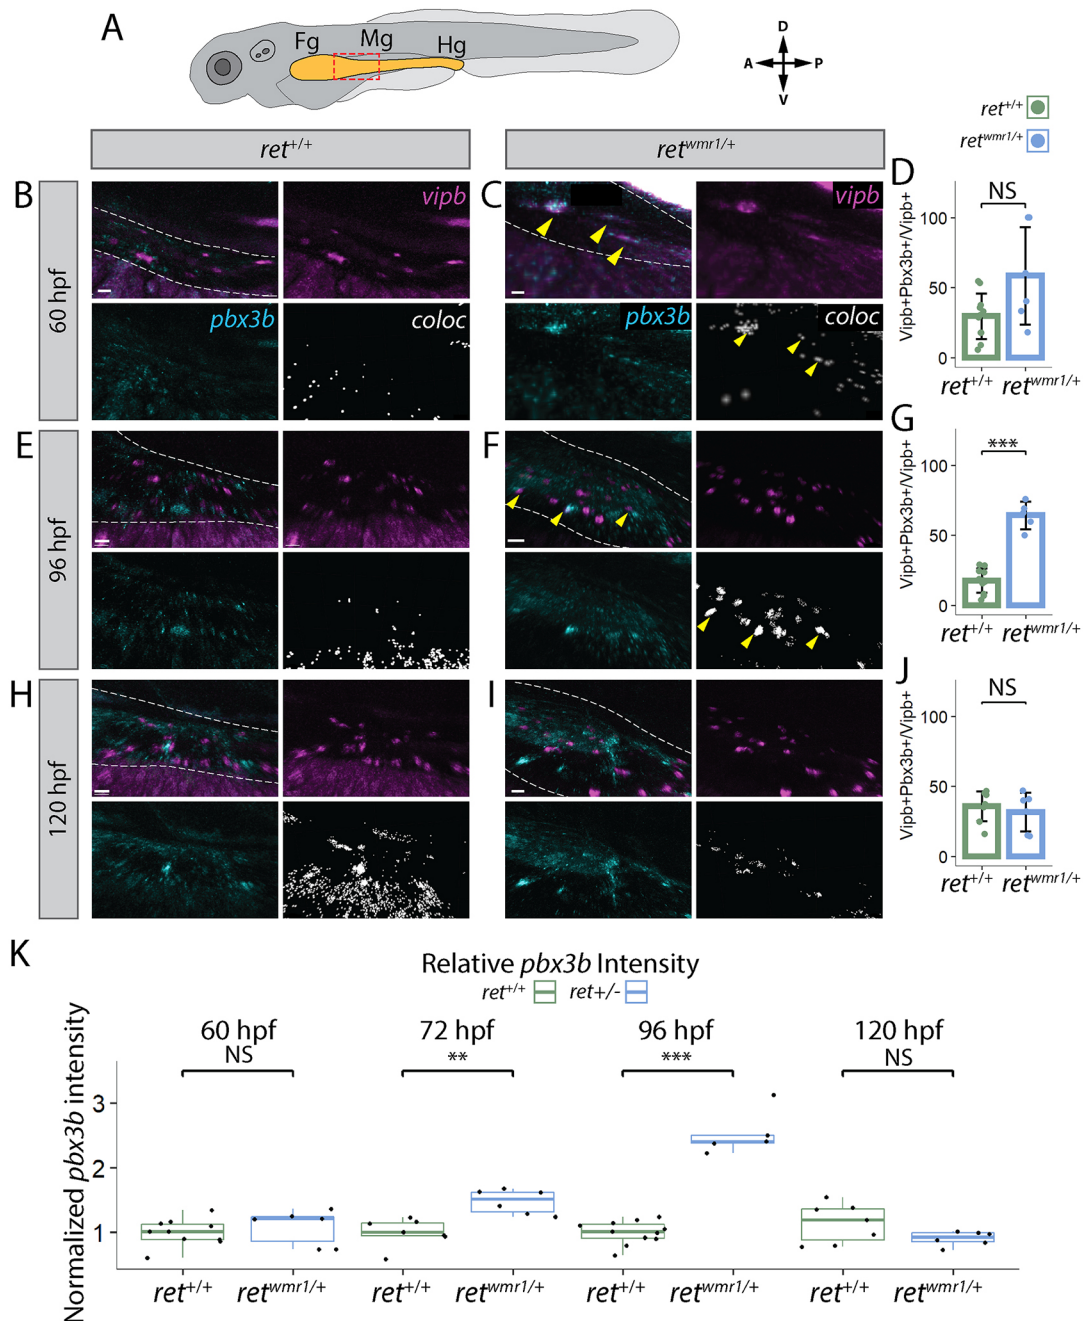

**Fig. 6.  $ret^{wvr1/+}$  ENCCs display accelerated neuron differentiation gene expression.** (A-K) Hybridization chain reaction (HCR) performed using probes targeting  $pbx3b$  and  $vipb$  transcripts. (A) Cartoon larvae denotes foregut (Fg), midgut (Mg) and hindgut (Hg) intestine (yellow) with red box indicating foregut-midgut boundary region of interest from which representative images are displayed. Representative images reveal  $vipb$  (magenta) and  $pbx3b$  (cyan) expression, and their colocalized (coloc) channel (white) within the gut tube (white dashed outline) at 60 hpf (B,C), 96 hpf (E,F) and 120 hpf (H,I). Yellow arrowheads indicate co-positive  $vipb^+/pbx3b^+$  ENCCs. (D,G,J) Quantification of percentage co-positive  $vipb^+/pbx3b^+$  calculated from total  $vipb^+$  ENCCs at 60 hpf (D), 96 hpf (G) (Wilcoxon signed-rank test, \*\*\* $P=0.00046$ ) and 120 hpf (J). In D  $ret^{+/+}$   $n=11$ ,  $ret^{wvr1/+}$   $n=6$ ; in G  $ret^{+/+}$   $n=11$ ,  $ret^{wvr1/+}$   $n=5$ ; in J  $ret^{+/+}$   $n=8$ ,  $ret^{wvr1/+}$   $n=6$ . Data are mean  $\pm$  s.e.m. (K) Mean  $pbx3b$  channel intensity quantified throughout entire gut tube and normalized to  $ret^{+/+}$  average intensity at 60 hpf (Wilcoxon signed-rank test, NS), 72 hpf (Wilcoxon signed-rank test, \*\* $P=0.00117$ ), 96 hpf (Wilcoxon signed-rank test, \*\*\* $P=0.00046$ ) and 120 hpf (Wilcoxon signed-rank test, NS). Box plots show median values (middle bars), and first to third interquartile ranges (boxes). Whiskers indicate  $1.5\times$  the interquartile ranges; dots indicate normalised mean pixel intensity of  $pbx3b$  fluorescence throughout the entire gut of individual fish. Scale bars: 20  $\mu$ m (B,C,I); 15  $\mu$ m (E); 30  $\mu$ m (F); 10  $\mu$ m (H). A, anterior; D, dorsal; NS, not significant; P, posterior; V, ventral.

percentage (~40%) of ENCCs with IPAN signature within the total population of  $vipb^+$  enteric neurons, suggesting premature enteric neuron specification rather than altered subtype-specification (Fig. 6H-J). To determine whether  $pbx3b$  transcript levels were differentially expressed between the conditions, total mean  $pbx3b$

pixel intensity was calculated throughout the entire gut tube tissue to approximate its total expression within the ENS, irrespective of its co-expression with  $vipb$  (Fig. 6K). Corroborating our previous  $pbx3b^+$  and  $vipb^+$  ENCC cell counts, the data demonstrated that  $ret^{wvr1/+}$  fish exhibited significantly higher levels of  $pbx3b$

expression than *ret*<sup>+/+</sup> tissue as early as 72 hpf, with the greatest discrepancy occurring at 96 hpf (Fig. 6K). Moreover, although the fraction of *pbx3b*<sup>+</sup> ENCCs was higher in *ret*<sup>wmr1/+</sup> fish at 96 hpf, no correlation was found between the fraction of *pbx3b*<sup>+</sup> ENCCs and the extent of aganglionosis in HSCR-like larvae (Fig. S3). These findings suggest that Ret signaling serves to regulate the timing at which ENCCs progress through their differentiation program, and consequentially their proliferative potential.

To determine whether enteric neuron differentiation timing was indeed altered, as suggested by the HCR *in situ* gene expression data, whole-mount immunohistochemistry was performed (Fig. 7) using antibodies targeting the pan-neuronal marker Elavl3, to label all enteric neurons, and choline acetyltransferase (ChAT), to label cholinergic enteric neurons, including IPANs (Furness et al., 2004; Morarach et al., 2021). Experiments were performed on *ret*<sup>+/+</sup> and *ret*<sup>wmr1/+</sup> fish at the developmental time points 96 hpf and 120 hpf to compare fractions of ChAT<sup>+</sup> neuron protein reactivity among Elavl3<sup>+</sup> enteric neurons (Fig. 7D,G). Comparable with *pbx3b* expression fractions (Fig. 6), the percentage of ChAT<sup>+</sup> cells was found to be significantly higher in *ret*<sup>wmr1/+</sup> larvae, compared with *ret*<sup>+/+</sup> larvae at 96 hpf (Fig. 7D); however, they were found to be at near equal levels by 120 hpf (Fig. 7G). Together, these data provide supporting evidence that a reduction in Ret function results in accelerated enteric neuron differentiation.

## DISCUSSION

We have used a zebrafish model to show, for the first time, *in toto* colonization of the gut by ENCC at single-cell resolution in a vertebrate. Over the course of 48 h of development, we found that several cellular and intercellular events are essential during

colonization, including ENCC number maintenance, migratory speed, ENCC spacing along the gut and proliferative expansion. Specifically, we mapped out the generations of all ENCC cells during their migration and found that proliferative expansion is dampened during precise temporal phases along the gut in *ret*<sup>wmr1/+</sup> mutants, greatly stalling enteric colonization and leading to severe colonic aganglionosis. Moreover, we discovered premature neuronal differentiation signatures in the context of aberrant *ret* heterozygous background, suggesting that Ret is required for proper timing of neurogenesis of ENCCs during their migration.

Previous studies performed in amniote models have demonstrated the necessity of proper ENCC numbers for gut colonization (Barlow et al., 2008; Peters-Van Der Sanden et al., 1993; Young et al., 2004). For example, in the avian ENS, manual ablation of NCCs at E1.5, before their entrance into gut, was sufficient to reduce the extent of ENCC colonization within the gut, highlighting the importance of proper cell numbers during the early stages of NCC migration (Barlow et al., 2008). Collectively, these studies provide supporting evidence for ‘population pressure’-driven migration, whereby sufficient ENCC numbers are required for sustained migration and subsequent ENS development. Our present work in the anamniote zebrafish corroborates and extends these previous findings in amniotes by demonstrating the association between total ENCC number and displacement of vanguard cells along the gut completely *in toto* – providing evidence of a conserved mechanism of ENCC migration present among vertebrates. Although the findings of our study appear congruent with studies performed in amniote models, it should be noted that the zebrafish ENS model has limitations when making comparisons with mammalian ENS development. Notably, the contribution of

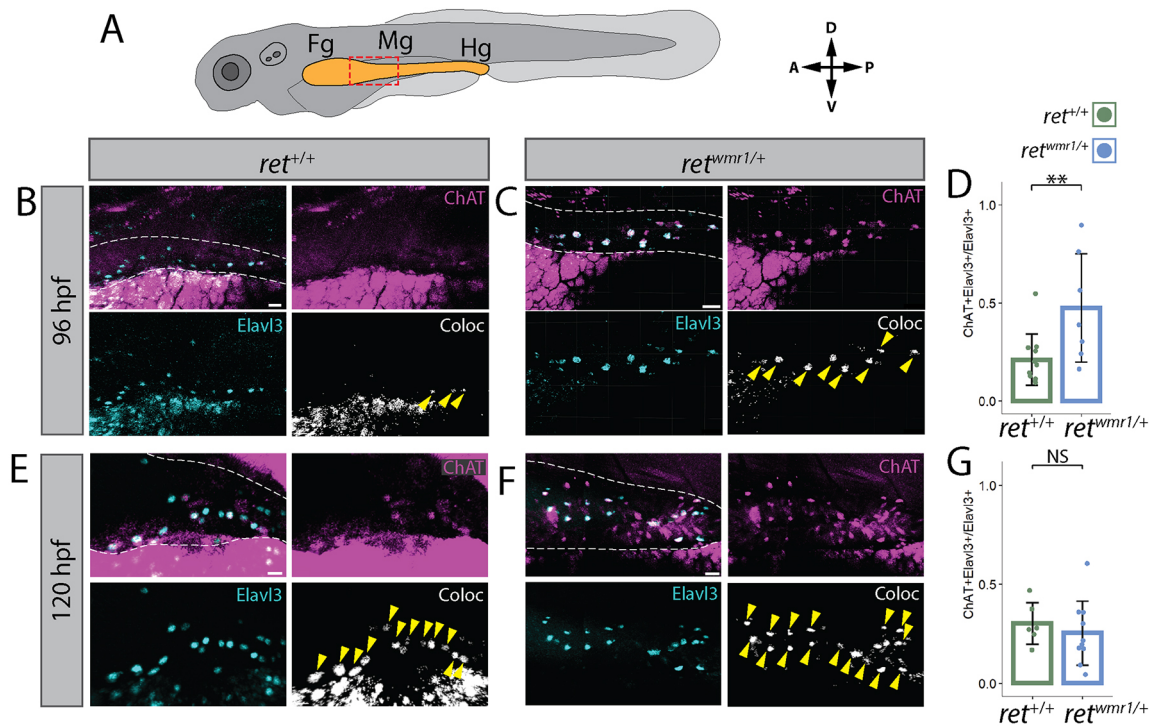

**Fig. 7. *ret*<sup>wmr1/+</sup> ENCCs display accelerated neuron immunoreactive signatures.** (A) Cartoon larvae denotes foregut (Fg), midgut (Mg) and hindgut (Hg) intestine (yellow) with red box indicating foregut-midgut boundary region of interest from which representative images are displayed. (B,C,E,F) Whole-mount immunohistochemistry performed using antibodies targeting ChAT and Elavl3. Representative images reveal ChAT (magenta) and Elavl3 (cyan) expression, and their colocalized (coloc) channel (white) within gut tube (white dashed outline) at 96 hpf (B,C) and 120 hpf (E,F). Yellow arrowheads indicate co-positive ChAT<sup>+</sup>/Elavl3<sup>+</sup> ENCCs. (D,G) Percent co-positive ChAT<sup>+</sup>/Elavl3<sup>+</sup> calculated from total Elavl3<sup>+</sup> enteric neurons at 96 hpf (\*\**P*=0.0083) (D) and 120 hpf (NS) (G). In D *ret*<sup>+/+</sup> *n*=11, *ret*<sup>wmr1/+</sup> *n*=7; in G *ret*<sup>+/+</sup> *n*=6, *ret*<sup>wmr1/+</sup> *n*=10. Data are mean±s.e.m. Scale bars: 20 μm (B,C,F); 15 μm (E).



sacral-NCCs to the ENS, which has been extensively shown during mammalian ENS development (Rao and Gershon, 2018), has not been shown in zebrafish to date. In addition, the zebrafish gut anatomy is less complex, lacking a submucosal ENS plexus, which is a crucial component of the mammalian ENS (Wallace et al., 2005).

Our data revealed a developmental window of time during which a critical number of ENCCs are required during gut colonization. Specifically, at 60 hpf, when ENCCs were approximately halfway through the zebrafish gut tube (midgut), we saw a significant reduction in ENCC proliferation in *ret<sup>wmr1/+</sup>* mutants compared with wild-type, the timing of which coincided with significantly increased inter-cell distances and reduced cell migration speeds. A complementary study performed in E12.5 mouse explants, a stage later in ENS development and comparable with 72 hpf in zebrafish, found that, following ablation of anterior localized ENCCs, isolated vanguard ENCCs posterior to the lesion site migrated at slower speeds, leading to the conclusion that cell number and cell-cell contact were required for proper migratory wavefront speed (Young et al., 2004). Very recently, a study using fixed mouse embryos found that colonization was drastically reduced/delayed in a *Ret* homozygous background and, upon examination of proliferation, discovered that ENCCs displayed reduced proliferation at E10.5 (Natarajan et al., 2022), which is roughly equivalent to zebrafish 54–60 hpf and in general alignment with our current findings. Our work at present also corroborates the conclusions of Young et al. (2004) by demonstrating a lower cell count correlated with shorter migration displacement and slower speeds. It is possible, in addition to the gut-length observation of decreased proliferation and speeds of ENCCs we saw following loss of *ret*, that early reduced ENCC numbers before gut entry could contribute to the observed phenotypes, which could be tested in a future study.

A recent study performed using a *ret<sup>+/-</sup>* zebrafish model, that also presents an ENS HSCR-like phenotype, found that reduced ENCC migration speed was observed when a subset of ENCCs were imaged during a window of time during colonization; however, proliferation was not noted to play a role in ENS phenotypes (Heanue et al., 2016). It should be noted that Heanue et al. used BrdU staining to assay proliferation, which labels S-phase of the cell cycle rather than M-phase labeling with pHH3. In addition, Heanue et al. assayed the single 48 hpf time point, potentially missing changes in ENCC proliferation present within their *ret<sup>+/-</sup>* zebrafish model that we observed at 60 hpf. As such, incongruences between our similar HSCR-like *ret<sup>+/-</sup>* zebrafish models are likely attributed to differences in assays performed, as well as time points assayed.

Imaging *in toto* gut colonization enabled us to spatiotemporally map the location of each ENCC generation throughout the full migratory phase of ENS formation *in vivo*, an undertaking not achieved in previous studies. From our study, we observed that vast generations of ENCCs colonize the gut. Specifically, we noticed that cell divisions with an axis perpendicular to the anterior-posterior (A-P) axis of the gut tube, produced a growing number of ENCC generations over time, which would colonize increasingly distant domains within the gut with each subsequent generation. Our findings on global ENCC tracing adds to previous focal lineage tracing experiments performed in zebrafish between 3.5 and 4 days postfertilization (dpf) (Kuwata et al., 2019). At those specific times, Kuwata and researchers found that ENCC proliferation occurred along all regions of the gut and corresponded with cell separation and displacement. In addition, Harrison et al. found that between 50 and 57 hpf, ENCCs in zebrafish *med24* morphants migrated along the gut tube much slower than controls, a finding that was associated with decreased mitotic rate (Harrison et al., 2014).

Collectively with previous work, our study supports the model of cell number-dependent migration, whereby proliferation is required to maintain optimal inter-cell distances among the population of migrating ENCCs in order to sustain the posterior expansion, an observation congruent to the ‘frontal expansion’ model of NCC migration that was previous postulated following mathematical modeling (Simpson et al., 2007).

Previous work carried out by others, as well as ourselves, found the TALE homeodomain transcription factor encoding transcript, *Pbx3*, to demarcate the transition of enteric neuroblast to differentiated enteric sensory neuron subtype, IPAN (Howard et al., 2021; Fleming et al., 2020; Morarach et al., 2021). Here, we demonstrate that *ret* heterozygous mutant background is capable of inducing premature expression of *pbx3b* during ENCC migration, providing evidence that Ret may serve to regulate the timing of neuronal differentiation among enteric neuroblasts. Although we observed higher levels of *pbx3b* expression in *ret<sup>wmr1/+</sup>* ENCCs compared with *ret<sup>+/+</sup>* controls between 72 and 96 hpf, the levels of *pbx3b* expression were found to be the same between *ret<sup>wmr1/+</sup>* and *ret<sup>+/+</sup>* fish by 120 hpf, suggesting premature neuronal differentiation rather than a change in enteric subtype specification. Collectively, these results argue that the reduction in proliferative expansion of *ret<sup>wmr1/+</sup>* ENCCs is correlated with the timing of their neuronal differentiation.

Our findings suggest that Ret signaling may function to regulate maintenance of a stem-state in enteric neural progenitors, a function that is likely conserved within the closely related vagal-NCC-derived sympathoadrenal precursors that have been shown to form neuroblastoma in the presence of constitutively active Ret mutations (Li et al., 2019). Ret inhibition has been shown to significantly reduce tumor growth in a neuroblastoma mouse model (Cazes et al., 2014), further supporting evidence that Ret signaling serves to regulate NCC-derived, neural progenitor proliferation. Mutations in *RET* have also been linked to additional human cancers including multiple endocrine neoplasia 2 (MEN2), papillary thyroid carcinoma (PTC) and non-small cell lung cancer (NSCLC) (Cazes et al., 2014; Li et al., 2019). In the case of these cancers, the *RET* mutations are found to be gain-of-function in nature, while *RET* missense and nonsense mutations found to cause HSCR are distinctly loss-of-function (Takahashi, 2001). In cancer, we see *RET* associated with tumorigenesis, whereas in HSCR we see a reduction in overall neuroblast number, collectively suggesting *RET* functions to regulate cell number.

Recently, a functional link between Pbx3 and Meis1 has been discovered during leukemia progression, where Pbx3 and Meis1 directly interact to promote the stability of Meis1, together co-driving tumor formation from transduced primary cells (Garcia-Cuellar et al., 2015). Furthermore, Garcia-Cuellar et al. noted that overexpression of Pbx3 led to a dramatic increase in Meis1 transcription, suggesting genetic interactions. In the developing nervous system, Pbx and Meis factors are well-known regulators of neurogenesis and, thus, their prolonged/enhanced expression could tip the balance between proliferation and differentiation, which remains to be tested in the ENS. The findings of this study implicate Pbx3 signaling downstream of Ret and highlight an area for continued investigation.

## MATERIALS AND METHODS

### Zebrafish husbandry

All work was performed under protocols approved by, and in accordance with, the Rice University Institutional Animal Care and Use Committee (IACUC). Zebrafish (*Danio rerio*) Tg(-8.3*phox2bb*:Kaede)<sup>em2Tg</sup>

(Harrison et al., 2014) adults were maintained as outcrosses with AB WT in our in-house zebrafish facility at 28.5°C on a 13 h light/11 h dark cycle. Tg(-8.3*phox2bb*:Kaede);*ret<sup>wmr1/+</sup>* fish line was maintained as AB outcrossed F1 adults and F2 embryos were collected following in-cross and processed identically to WT embryos. F2 adults were in-crossed. In the resulting embryos the hpf was carefully recorded, and the embryos were sorted for Kaede<sup>+</sup> individuals. All embryos were cultured in standard E3 media until 24 hpf, then transferred to a 1×1-phenyl 2-thiourea (PTU)/E3 solution (Sigma-Aldrich, P7629) (Karlsson et al., 2001) to prevent the formation of melanin pigment.

### CRISPR-Cas9 guide design

A sgRNA targeting exon 8 of *ret* (GAGACAGCGAGGAGACTGTG) was designed by manually searching the *ret* CDS (ENSDARG0000055305.7) for protospacer adjacent motifs (PAM) within CDS domains. The generation of sgRNA and generation of *cas9* mRNA were based on previously described work (Clements et al., 2017; Gagnon et al., 2014). Briefly, these methods included the use of MEGAscript *in vitro* transcription kit (Invitrogen, AM1330) to generate *cas9* mRNA from a pCS2-nls-*cas9* vector (Jao et al., 2013) and the sgRNA from a custom DNA oligo containing an SP6 promoter (Gagnon et al., 2014).

### CRISPR-Cas9 microinjection, *ret<sup>wmr1/+</sup>* fish line establishment and genotyping, *ret<sup>wmr1</sup>* mRNA functional analysis

Zebrafish embryos obtained from in-crossing Tg(-8.3*phox2bb*:Kaede)<sup>+/-</sup> adults were injected through the chorion at the one-cell stage with a cocktail containing phenol red dye (1:8 µl), 150 pg *cas9* mRNA and 40 pg sgRNA targeting exon 8 of *ret* (GAGACAGCGAGGAGACTGTG) (as described above). Injected F0 embryos were raised to 5 dpf, and screened for ENS defects in which regions of the intestine lacked Kaede<sup>+</sup> cells in order to validate successful CRISPR-Cas9 activity (Fig. S4). Injected embryos exhibiting WT phenotype were collected and raised in our in-house zebrafish facility, and when reaching sexual maturity were outcrossed to AB WT. Resulting F1 embryos were screened for WT phenotype at 5 dpf and raised to sexual maturity. Resulting F1 adults were fin clipped and genotyped (Meeker et al., 2007) using forward (GCTATGCGGAATGCAATAGC) and reverse (AATCCTGAGGACAGATGGAG) primers to produce 561 bp amplicon from the *ret* locus. F1 heterozygous adults harboring identical 11 bp deletions (as described in results) in *ret* were designated *ret<sup>wmr1/+</sup>* fish line. Functional loss of *ret<sup>wmr1</sup>* was validated by injecting 30 pg of *ret<sup>wmr1</sup>* and *ret<sup>WT</sup>* mRNA into F2 embryos obtained from an in-cross of the *ret<sup>wmr1/+</sup>* fish line. The *ret9* isoform has previously been shown to be sufficient to drive ENS formation in zebrafish (Heaneu and Pachnis, 2008). Injected F2 embryos were screened at 96 hpf and scored for total number of embryos exhibiting either WT (*ret<sup>+/+</sup>*), hypoganglionosis (HSCR-like) (*ret<sup>wmr1/+</sup>*) or total aganglionosis (*ret<sup>wmr1/wmr1</sup>*) phenotypes (Fig. S2). In order to generate *ret<sup>wmr1</sup>* and *ret<sup>WT</sup>* mRNA, *ret<sup>+/+</sup>* and *ret<sup>wmr1/wmr1</sup>* embryos were separately processed for total RNA extraction using standard Trizol/chloroform RNA precipitation. Total RNA extractions were used to generate *ret<sup>+/+</sup>* and *ret<sup>wmr1/wmr1</sup>* cDNA libraries using the SuperScript IV kit (Invitrogen, 18091050). Both *ret9* (ENSDART00000139237.3) and *ret51* (ENSDART00000077627.7) splice variants were amplified from cDNA libraries using forward (GGCTCCTTTCGC-TCGAATCA) and reverse (ACACTCAGCTTAATGTAGTTATTGTTG-CAC) primers and Phusion PCR (Invitrogen). *ret9* and *ret51* splice variant amplicons were cloned into pCR-Blunt II-TOPO vector using the manufacturer's instructions (Invitrogen, 45-0245). Zero Blunt TOPO reactions were transformed into Max Efficiency DH5α bacteria (Invitrogen, 18258-012). Bacteria were mini-prepped and screened using restriction digest cloning. Presumptive plasmids containing *ret<sup>wmr1</sup>* and *ret<sup>WT</sup>* cDNA were confirmed following whole-plasmid sequencing by Plasmidsaurus. PolyA sequences were amplified from pCS2+ vector and fastcloned (Li et al., 2011) into TOPO-*ret<sup>wmr1</sup>* and TOPO-*ret<sup>WT</sup>* plasmids using forward (PolyA: CCTTCCATAGGAAGAGCTGTGATCCAGACATGATAAGATAC; TOPO: CAAGCTTGATGCATAGCTTGAG) and reverse (PolyA: CAAGCTATGCATCAAGCTTGGTTAACTTGTATTGTCAGC; TOPO: ACAGCTCTCTATGGAAGG) primers. Fastcloning reactions were transformed, prepped and validated using previously mentioned methods.

Sequenced validated TOPO-*ret<sup>wmr1</sup>*-PolyA and TOPO-*ret<sup>WT</sup>*-PolyA plasmids were linearized with HpaI restriction enzyme and used to generate *ret<sup>wmr1</sup>* and *ret<sup>WT</sup>* mRNA using mMACHINE T7 *in vitro* mRNA synthesis (Invitrogen, AM1344). mRNA synthesis reactions were cleaned using Monarch RNA Cleanup Kit (New England Biolabs, T2040L) and visualized using agarose gel-electrophoresis. Pure *ret<sup>wmr1</sup>* and *ret<sup>WT</sup>* mRNA was titrated and quantified using nanodrop to inject 30 pg using same methods described for CRISPR-Cas9 injections.

### Confocal time-lapse microscopy of *in toto* ENCC migration

F2 embryos from an in-cross of F1 Tg(-8.3*phox2bb*:Kaede);*ret<sup>wmr1/+</sup>* fish were manually dechorionated using fine forceps, then mounted in 15 µ-Slide 4 Well imaging chambers (Ibidi, 80427) using 1.0% low melt temperature agarose dissolved in 1× PTU/E3 media. Embedded embryos were then covered in E3 media supplemented with 0.4% Tricane (Sigma-Aldrich, A5040) and 1× PTU/E3 media. Confocal time-lapse microscopy was performed using an Olympus FV3000 and FluoView software (2.4.1.198), using a long working distance 20.0× objective (UCPLFLN20X) at a constant temperature of 28°C using OKOLAB Uno-controller imaging incubator. Four-dimensional time-lapse was performed to capture full gut (*in toto*) volumes along the x-y-z planes using a tiling method to capture the full-length of the gut in two regions of interest, at ~524-1314 s intervals for 48 consecutive hours, covering 48-96 hpf of development. *ret<sup>+/+</sup>* (*n*=3), *ret<sup>wmr1/+</sup>* (*n*=3). Time-lapse datasets were stitched in Cellsens software and were exported and saved as .oir files, then processed further using Imaris, as described below. Fidelity of cell tracking to discriminate individual ENCCs was ensured using an H2A-mCherry marker in alternative fish line, Tg(-8.3*phox2bb*:Kaede;H2A-mCherry; P.A.B., unpublished) (Fig. S5).

### Enteric cell tracking and generation analysis

Cell tracking was performed using spots lineage-tracking function in Imaris (version 9.7.2). The position of every individual ENCC body (spot) was tracked across each time point along the x-y-z planes using manual spot detection in the Kaede channel to determine the migratory track and generation of the entire ENCC population per fish (Fig. S1). Every ENCC was labeled manually within the spot lineage tracks by applying a unique ID to denote cell generation as a decimal. Generation IDs were empirically assigned based on assumed asymmetrical division along the A-P axis. That is, as a tracked cell gave rise to two cells by dividing along an axis perpendicular to the A-P axis of the gut tube, the anterior daughter cell retained the ID of the parent cell, while the posterior daughter obtained a new generation ID with a decimal denoted +1 the parent cell. Generations were viewed in the Vantage viewer of Imaris for global visualizations. Vanguard cells were defined as the leading-edge migratory cells along the gut. Therefore, the leader identity may change when the current leader is overtaken by a new cell born by cell division during migration. Total raw data of spots tracking was exported from Imaris and further analyzed for graphical depictions using R studio (version 1.3.959; package ggplot2 version 3.3.2). For data depicting cell 'distance from foregut', distance was defined based on origin reference frames placed in the anterior foregut, at the level of 13-14th somite anterior to the cloaca.

### Hybridization chain reaction and pHH3 whole-mount immunohistochemistry

Hybridization chain reaction experiments were performed in accordance with previously described methods (Howard et al., 2021; Ibarra-García-Padilla et al., 2021) (RefSeq IDs: *vipb*, NM\_001114555.1; *pdx3b*, BC131865.1). Whole-mount immunofluorescence experiments were conducted according to methods previously described (Baker et al., 2019). All F2 *ret<sup>wmr1/+</sup>* embryos used for fixed tissue experiments were screened for the HSCR-like phenotype in which Kaede<sup>+</sup> ENCCs had failed to reach the hindgut at 72 hpf, 80 hpf, 96 hpf and 120 hpf. Experiments using 60 hpf fixed tissue were not able to be sorted based on phenotype. For these experiments, individual F2 embryos obtained from F1 *ret<sup>wmr1/+</sup>* in-cross were fixed in individual wells within a 96-well plate following careful dissection of the head. Head tissue was processed for gDNA in separate 96-well plates with 30 µl NaOH. Heads were boiled at 95°C for 10 min, briefly vortexed, then pH balanced with 3 µl 1 M Tris HCL (pH 8.0) and



stored at  $-20^{\circ}\text{C}$ . gDNA was used as template for PCR using forward (GCCACGATTTCCAGCTTGTGC) and reverse (ACTGGCATCTCCC-TGTTGG) primers that amplify a small, 89 bp segment surrounding the lesion site. PCR product was processed using T7 endonuclease assay (Fig. S6) per the manufacturer's instruction (New England Biolabs, E3321) to identify *ret<sup>tmnr1/+</sup>* embryos, which were then pooled and processed via previously described HCR and whole-mount immunohistochemical preparations. The following primary antibodies were used: mouse monoclonal anti-phospho-Histone H3 IgG1 (Abcam, ab14955, 1:1500), rabbit polyclonal anti-Kaede IgG (MBL international, PM102M, 1:250) and mouse monoclonal anti-HuC/HuD (Elavl3/4) IgG2b (Invitrogen Molecular Probes, A21271, 1:200). The following secondary antibodies were ordered from Invitrogen: Alexa Fluor 488 goat anti-rabbit IgG (A11008, 1:500), Alexa Fluor 647 goat anti-mouse IgG2b (A21242, 1:500) and Alexa Fluor 568 goat anti-mouse IgG1b (A21124, 1:500). Confocal microscopy was performed using an Olympus FV3000 and FluoView software (2.4.1.198), using a long working distance 20.0 $\times$  objective (UCPLFLN20X).

### Statistics

Statistical analysis was performed in R studio software (version 1.3.959; Package *gsgnif* version 0.6.0 and Package *stats* version 4.0.2]. Shapiro-Wilk was used to test normality. For comparisons, normally distributed data were tested using two-tailed unpaired *t*-test and non-normally distributed using Wilcoxon signed-rank test, \* $P < 0.05$ , \*\* $P < 0.01$  and \*\*\* $P < 0.001$ . NS, non-significant ( $P < 0.05$ ). Post hoc power analysis was performed using G\*Power 3 and found sufficient statistical power ( $>0.8$ ) for all tests in which we report statistical significance (Faul et al., 2007).

### Acknowledgement

Imaris image analysis was performed using the Rice University Shared Equipment Authority (SEA) Imaris workstation and we thank Alloysius Budi Utama for his insights and training with this software. We thank Dan Wagner (Rice University) for helpful advice throughout this project. We also thank Thom Yorke and Simon Green for technical assistance.

### Competing interests

The authors declare no competing or financial interests.

### Author contributions

Conceptualization: P.A.B., R.A.U.; Methodology: P.A.B., R.I.-G.-P., R.A.U.; Validation: P.A.B., R.I.-G.-P., A.V., E.W.S., R.A.U.; Formal analysis: P.A.B., R.I.-G.-P., A.V., R.A.U.; Investigation: P.A.B., R.I.-G.-P., A.V., E.W.S.; Resources: R.A.U.; Data curation: P.A.B., A.V., E.W.S., R.A.U.; Writing - original draft: P.A.B., R.A.U.; Writing - review & editing: P.A.B., R.I.-G.-P., A.V., E.W.S., R.A.U.; Visualization: P.A.B., R.A.U.; Supervision: R.A.U.; Project administration: R.A.U.; Funding acquisition: R.A.U.

### Funding

This project was funded by Rice University, the Cancer Prevention and Research Institute of Texas (CPRIT) Recruitment of First-Time Tenure Track Faculty Members (CPRIT-RR170062 to R.A.U.), from National Science Foundation CAREER Award (1942019 to R.A.U.) and the National Institutes of Health (DK124804 to R.A.U.).

### Peer review history

The peer review history is available online at <https://journals.biologists.com/dev/lookup/doi/10.1242/dev.200668.reviewer-comments.pdf>.

### References

Amiel, J., Sproat-Emison, E., Garcia-Barcelo, M., Lantieri, F., Burzynski, G., Borrego, S., Pelet, A., Arnold, S., Miao, X., Griseri, P. et al. (2008). Hirschsprung disease, associated syndromes and genetics: a review. *J. Med. Genet.* **45**, 1-14. doi:10.1136/jmg.2007.053959

Baker, P. A., Meyer, M. D., Tsang, A. and Uribe, R. A. (2019). Immunohistochemical and ultrastructural analysis of the maturing larval zebrafish enteric nervous system reveals the formation of a neuropil pattern. *Sci. Rep.* **9**, 6941. doi:10.1038/s41598-019-43497-9

Barlow, A. J., Wallace, A. S., Thapar, N. and Burns, A. J. (2008). Critical numbers of neural crest cells are required in the pathways from the neural tube to the foregut to ensure complete enteric nervous system formation. *Development* **135**, 1681-1691. doi:10.1242/dev.017418

Cazes, A., Lopez-Delisle, L., Tsarovina, K., Pierre-Eugène, C., De Preter, K., Peuchmaur, M., Nicolas, A., Provost, C., Louis-Brennetot, C., Daveau, R.

et al. (2014). Activated Alk triggers prolonged neurogenesis and Ret upregulation providing a therapeutic target in ALK-mutated neuroblastoma. *Oncotarget* **5**, 2688-2702. doi:10.18632/oncotarget.1883

Clements, T. P., Tandon, B., Lintel, H. A., Mccarty, J. H. and Wagner, D. S. (2017). RICE CRISPR: rapidly increased cut ends by an exonuclease Cas9 fusion in zebrafish. *Genesis* **55**, e23044. doi:10.1002/dvg.23044

Faul, F., Erdfelder, E., Lang, A. G. and Buchner, A. (2007). G\*Power 3: a flexible statistical power analysis program for the social, behavioral, and biomedical sciences. *Behav. Res. Methods* **39**, 175-191. doi:10.3758/bf03193146

Fleming, M. A., Ehsan, L., Moore, S. R. and Levin, D. E. (2020). The enteric nervous system and its emerging role as a therapeutic target. *Gastroenterol. Res. Pract.* **2020**, 8024171. doi:10.1155/2020/8024171

Furness, J. B., and Wiley InterScience (Online service). (2006). *The Enteric Nervous System*. Blackwell Publishing.

Furness, J. B., Jones, C., Nurgali, K. and Clerc, N. (2004). Intrinsic primary afferent neurons and nerve circuits within the intestine. *Prog. Neurobiol.* **72**, 143-164. doi:10.1016/j.pneurobio.2003.12.004

Gagnon, J. A., Valen, E., Thyme, S. B., Huang, P., Ahkmetova, L., Pauli, A., Montague, T. G., Zimmerman, S., Richter, C. and Schier, A. F. (2014). Efficient mutagenesis by Cas9 protein-mediated oligonucleotide insertion and large-scale assessment of single-guide RNAs. *PLoS One* **9**, e98186. doi:10.1371/journal.pone.0098186

Ganz, J. (2018). Gut feelings: Studying enteric nervous system development, function, and disease in the zebrafish model system. *Dev. Dyn.* **247**, 268-278. doi:10.1002/dvdy.24597

Garcia-Cuellar, M. P., Steger, J., Füller, E., Hetzner, K. and Slany, R. K. (2015). Pbx3 and Meis1 cooperate through multiple mechanisms to support Hox-induced murine leukemia. *Haematologica* **100**, 905. doi:10.3324/haematol.2015.124032

Gurley, L. R., D'anna, J. A., Barham, S. S., Deaven, L. L. and Tobey, R. A. (1978). Histone phosphorylation and chromatin structure during mitosis in Chinese hamster cells. *Eur. J. Biochem.* **84**, 1-15. doi:10.1111/j.1432-1033.1978.tb12135.x

Harris, M. L. and Erickson, C. A. (2007). Lineage specification in neural crest cell pathfinding. *Dev. Dyn.* **236**, 1-19. doi:10.1002/dvdy.20919

Harrison, C., Wabbersen, T. and Shepherd, I. T. (2014). In vivo visualization of the development of the enteric nervous system using a *Tg(-8.3bphox2b:Kaede)* transgenic zebrafish. *Genesis* **52**, 985-990. doi:10.1002/dvg.22826

Heanue, T. A. and Pachnis, V. (2007). Enteric nervous system development and Hirschsprung's disease: advances in genetic and stem cell studies. *Nat. Rev. Neurosci.* **8**, 466-479. doi:10.1038/nrn2137

Heanue, T. A. and Pachnis, V. (2008). Ret isoform function and marker gene expression in the enteric nervous system is conserved across diverse vertebrate species. *Mech. Dev.* **125**, 687-699. doi:10.1016/j.mod.2008.04.006

Heanue, T. A., Boesmans, W., Bell, D. M., Kawakami, K., Vanden Berghe, P. and Pachnis, V. (2016). A novel zebrafish ret heterozygous model of hirschsprung disease identifies a functional role for mapk10 as a modifier of enteric nervous system phenotype severity. *PLoS Genet.* **12**, e1006439. doi:10.1371/journal.pgen.1006439

Hendzel, M. J., Wei, Y., Mancini, M. A., Van Hooser, A., Ranalli, T., Brinkley, B. R., Bazett-Jones, D. P. and Allis, C. D. (1997). Mitosis-specific phosphorylation of histone H3 initiates primarily within pericentromeric heterochromatin during G2 and spreads in an ordered fashion coincident with mitotic chromosome condensation. *Chromosom* **106**, 348-360. doi:10.1007/s004120050256

Hockley, J. R. F., Taylor, T. S., Callejo, G., Wilbrey, A. L., Gutteridge, A., Bach, K., Winchester, W. J., Bulmer, D. C., McMurray, G. and Smith, E. S. J. (2019). Single-cell RNAseq reveals seven classes of colonic sensory neuron. *Gut* **68**, 633-644. doi:10.1136/gutjnl-2017-315631

Howard, A. G., Baker, P. A., Ibarra-García-Padilla, R., Moore, J. A., Rivas, L. J., Tallman, J. J., Singleton, E. W., Westheimer, J. L., Corteguera, J. A. and Uribe, R. A. (2021). An atlas of neural crest lineages along the posterior developing zebrafish at single-cell resolution. *Elife* **10**, e60005. doi:10.7554/eLife.60005

Howard, A. G. A., Nguyen, A. C., Tworig, J., Ravisankar, P., Singleton, E. W., Li, C., Kotzur, G., Waxman, J. S. and Uribe, R. A. (2022). Elevated Hoxb5b expands vagal neural crest pool and blocks enteric neuronal development in Zebrafish. *Front. Cell Dev. Biol.* **9**, 803370. doi:10.3389/fcell.2021.803370

Hutchins, E. J., Kunttas, E., Piacentino, M. L., Howard, A. G. A., Bronner, M. E. and Uribe, R. A. (2018). Migration and diversification of the vagal neural crest. *Dev. Biol.* **444**, S98-S109. doi:10.1016/j.ydbio.2018.07.004

Ibarra-García-Padilla, R., Howard, A. G. A., Singleton, E. W. and Uribe, R. A. (2021). A protocol for whole-mount immuno-coupled hybridization chain reaction (WICHCR) in zebrafish embryos and larvae. *STAR Protoc.* **2**, 100709. doi:10.1016/j.xpro.2021.100709

Jao, L. E., Wentz, S. R. and Chen, W. (2013). Efficient multiplex allelic zebrafish genome editing using a CRISPR nuclease system. *Proc. Natl. Acad. Sci. USA* **110**, 13904-13909. doi:10.1073/pnas.1308335110

Karlsson, J., Von Hofsten, J. and Olsson, E. (2001). Generating transparent zebrafish: a refined method to improve detection of gene expression during

- embryonic development. *Mar. Biotechnol.* **3**, 522-527. doi:10.1007/s1012601-0053-4
- Kuo, B. R. and Erickson, C. A.** (2011). Vagal neural crest cell migratory behavior: a transition between the cranial and trunk crest. *Dev. Dyn.* **240**, 2084-2100. doi:10.1002/dvdy.22715
- Kuwata, M., Nikaido, M. and Hatta, K.** (2019). Local heat-shock mediated multi-color labeling visualizing behaviors of enteric neural crest cells associated with division and neurogenesis in zebrafish gut. *Dev. Dyn.* **248**, 437-448. doi:10.1002/dvdy.36
- Lake, J. I. and Heuckeroth, R. O.** (2013). Enteric nervous system development: migration, differentiation, and disease. *Am. J. Physiol. Gastrointest. Liver Physiol.* **305**, G1-G24. doi:10.1152/ajpgi.00452.2012
- Landman, K. A., Simpson, M. J. and Newgreen, D. F.** (2007). Mathematical and experimental insights into the development of the enteric nervous system and Hirschsprung's disease. *Dev. Growth Differ.* **49**, 277-286. doi:10.1111/j.1440-169X.2007.00929.x
- Le Douarin, N. M. and Teillet, M.-A.** (1973). The migration of neural crest cells to the wall of the digestive tract in avian embryo. *Development* **30**, 31-48.
- Li, C., Wen, A., Shen, B., Lu, J., Huang, Y. and Chang, Y.** (2011). FastCloning: a highly simplified, purification-free, sequence- and ligation-independent PCR cloning method. *BMC Biotechnol.* **11**, 92. doi:10.1186/1472-6750-11-92
- Li, A. Y., Mccusker, M. G., Russo, A., Scilla, K. A., Gittens, A., Arensmeyer, K., Mehra, R., Adamo, V. and Rolfo, C.** (2019). RET fusions in solid tumors. *Cancer Treat. Rev.* **81**, 101911. doi:10.1016/j.ctrv.2019.101911
- Meeker, N. D., Hutchinson, S. A., Ho, L. and Trede, N. S.** (2007). Method for isolation of PCR-ready genomic DNA from zebrafish tissues. *BioTechniques* **43**, 610-614. doi:10.2144/000112619
- Morarach, K., Mikhailova, A., Knoflach, V., Memic, F., Kumar, R., Li, W., Ernfor, P. and Marklund, U.** (2021). Diversification of molecularly defined myenteric neuron classes revealed by single-cell RNA sequencing. *Nat. Neurosci.* **24**, 34-46. doi:10.1038/s41593-020-00736-x
- Nagy, N. and Goldstein, A. M.** (2017). Enteric nervous system development: a crest cell's journey from neural tube to colon. *Semin. Cell Dev. Biol.* **66**, 94-106. doi:10.1016/j.semcdb.2017.01.006
- Natarajan, D., Marcos-Gutierrez, C., Pachnis, V. and De Graaff, E.** (2002). Requirement of signalling by receptor tyrosine kinase RET for the directed migration of enteric nervous system progenitor cells during mammalian embryogenesis. *Development* **129**, 5151-5160. doi:10.1242/dev.129.22.5151
- Natarajan, D., Mccann, C., Dattani, J., Pachnis, V. and Thapar, N.** (2022). Multiple roles of ret signalling during enteric neurogenesis. *Front. Mol. Neurosci.* **15**, 832317. doi:10.3389/fnmol.2022.832317
- Nikaido, M., Izumi, S., Ohnuki, H., Takigawa, Y., Yamasu, K. and Hatta, K.** (2018). Early development of the enteric nervous system visualized by using a new transgenic zebrafish line harboring a regulatory region for choline acetyltransferase a (chata) gene. *Gene Expr. Patterns* **28**, 12-21. doi:10.1016/j.gep.2018.01.003
- Olden, T., Akhtar, T., Beckman, S. A. and Wallace, K. N.** (2008). Differentiation of the zebrafish enteric nervous system and intestinal smooth muscle. *Genesis* **46**, 484-498. doi:10.1002/dvg.20429
- Olsson, C., Holmberg, A. and Holmgren, S.** (2008). Development of enteric and vagal innervation of the zebrafish (*Danio rerio*) gut. *J. Comp. Neurol.* **508**, 756-770. doi:10.1002/cne.21705
- Pérez-Cadahía, B., Drohic, B. D. and Davie, J. R.** (2009). H3 phosphorylation: dual role in mitosis and interphase. *Biochem. Cell Biol.* **87**, 695-709. doi:10.1139/o09-053
- Peters-Van Der Sanden, M. J. H., Kirby, M. L., Gittenberger-De Groot, A., Tibboel, D., Mulder, M. P. and Meijers, C.** (1993). Ablation of various regions within the avian vagal neural crest has differential effects on ganglion formation in the fore-, Mid-and Hindgut. *Dev. Dyn.* **196**, 183-194. doi:10.1002/aja.1001960305
- Rao, M. and Gershon, M. D.** (2018). Enteric nervous system development: what could possibly go wrong? *Nat. Rev. Neurosci.* **19**, 552-565. doi:10.1038/s41583-018-0041-0
- Shepherd, I. and Eisen, J.** (2011). Development of the zebrafish enteric nervous system. *Methods Cell Biol.* **101**, 143-160. doi:10.1016/B978-0-12-387036-0.00006-2
- Shepherd, I. T., Pietsch, J., Elworthy, S., Kelsh, R. N. and Raible, D. W.** (2004). Roles for GFR $\alpha$ 1 receptors in zebrafish enteric nervous system development. *Development* **131**, 241-249. doi:10.1242/dev.00912
- Simpson, M. J., Zhang, D. C., Mariani, M., Landman, K. A. and Newgreen, D. F.** (2007). Cell proliferation drives neural crest cell invasion of the intestine. *Dev. Biol.* **302**, 553-568. doi:10.1016/j.ydbio.2006.10.017
- Southard-Smith, E. M., Kos, L. and Pavan, W. J.** (1998). SOX10 mutation disrupts neural crest development in Dom Hirschsprung mouse model. *Nat. Genet.* **18**, 60-64. doi:10.1038/ng0198-60
- Stanchina, L., Baral, V., Robert, F., Pingault, V., Lemort, N., Pachnis, V., Goossens, M. and Bondurand, N.** (2006). Interactions between Sox10, Edn3 and Ednrb during enteric nervous system and melanocyte development. *Dev. Biol.* **295**, 232-249. doi:10.1016/j.ydbio.2006.03.031
- Takahashi, M.** (2001). The GDNF/RET signaling pathway and human diseases. *Cytokine Growth Factor Rev.* **12**, 361-373. doi:10.1016/S1359-6101(01)00012-0
- Taraviras, S., Marcos-Gutierrez, C. V., Durbec, P., Jani, H., Grigoriou, M., Sukumaran, M., Wang, L. C., Hynes, M., Raisman, G. and Pachnis, V.** (1999). Signalling by the RET receptor tyrosine kinase and its role in the development of the mammalian enteric nervous system. **126**, 2785-2797. doi:10.1242/dev.126.12.2785
- Taylor, C. R., Montagne, W. A., Eisen, J. S. and Ganz, J.** (2016). Molecular fingerprinting delineates progenitor populations in the developing zebrafish enteric nervous system. *Dev. Dyn.* **245**, 1081-1096. doi:10.1002/dvdy.24438
- Theveneau, E. and Mayor, R.** (2011). Can mesenchymal cells undergo collective cell migration? The case of the neural crest. *Cell Adhes. Migr.* **5**, 490-498. doi:10.4161/cam.5.6.18623
- Uesaka, T., Nagashimada, M., Yonemura, S. and Enomoto, H.** (2008). Diminished Ret expression compromises neuronal survival in the colon and causes intestinal aganglionosis in mice. *J. Clin. Invest.* **118**, 1890-1898. doi:10.1172/JCI34425
- Uribe, R. A. and Bronner, M. E.** (2015). Meis3 is required for neural crest invasion of the gut during zebrafish enteric nervous system development. *Mol. Biol. Cell* **26**, 3728-3740. doi:10.1091/mbc.E15-02-0112
- Wallace, K. N., Akhter, S., Smith, E. M., Lorent, K. and Pack, M.** (2005). Intestinal growth and differentiation in zebrafish. *Mech. Dev.* **122**, 157-173. doi:10.1016/j.mod.2004.10.009
- Young, H. M., Hearn, C. J., Farlie, P. G., Canty, A. J., Thomas, P. Q. and Newgreen, D. F.** (2001). GDNF is a chemoattractant for enteric neural cells. *Dev. Biol.* **229**, 503-516. doi:10.1006/dbio.2000.0100
- Young, H. M., Bergner, A. J., Anderson, R. B., Enomoto, H., Milbrandt, J., Newgreen, D. F. and Whittington, P. M.** (2004). Dynamics of neural crest-derived cell migration in the embryonic mouse gut. *Dev. Biol.* **270**, 455-473. doi:10.1016/j.ydbio.2004.03.015
